# Supplementary material for: Countering misinformation via WhatsApp: Preliminary evidence from the COVID-19 pandemic in Zimbabwe
Source: PubMed Central journal article supplement (PMC7556529; doi:10.1371/journal.pone.0240005), 2020-10-14
Supplement: pone.0240005.s005.pdf [file pone.0240005.s005.pdf]

S1 Table. Summary Statistics

|                                                 | Obs. | Mean  | SD    | Min   | Max   |
|-------------------------------------------------|------|-------|-------|-------|-------|
| <b>Main treatment variables:</b>                |      |       |       |       |       |
| Treatment                                       | 868  | 0.52  | 0.50  | 0.00  | 1.00  |
| Long list in list experiment                    | 868  | 0.49  | 0.50  | 0.00  | 1.00  |
| <b>Main outcome variables:</b>                  |      |       |       |       |       |
| Knowledge                                       | 864  | 0.01  | 1.00  | -2.03 | 1.85  |
| Behavior                                        | 861  | 2.64  | 0.90  | 0.00  | 5.00  |
| <b>Correct response to knowledge questions:</b> |      |       |       |       |       |
| <i>Week 1:</i>                                  |      |       |       |       |       |
| 25% of infected are symptomless                 | 583  | 0.36  | 0.48  | 0.00  | 1.00  |
| Distancing cuts infection rates almost entirely | 570  | 0.83  | 0.38  | 0.00  | 1.00  |
| <i>Week 2:</i>                                  |      |       |       |       |       |
| Drinking hot water helps                        | 283  | 0.30  | 0.46  | 0.00  | 1.00  |
| Hand washing with soap helps                    | 283  | 0.70  | 0.46  | 0.00  | 1.00  |
| Inhaling hot steam helps                        | 283  | 0.25  | 0.43  | 0.00  | 1.00  |
| Washing surface with disinfectant helps         | 283  | 0.56  | 0.50  | 0.00  | 1.00  |
| <b>Other variables:</b>                         |      |       |       |       |       |
| Qualtrics                                       | 868  | 0.18  | 0.39  | 0.00  | 1.00  |
| Urban                                           | 868  | 0.76  | 0.43  | 0.00  | 1.00  |
| Female                                          | 868  | 0.45  | 0.50  | 0.00  | 1.00  |
| Months subscribed                               | 868  | 20.63 | 19.41 | 1.00  | 76.00 |
| WhatsApp broadcast list response rate (%)       | 868  | 0.02  | 0.02  | 0.00  | 0.17  |
