# Supplementary material for: Countering misinformation via WhatsApp: Preliminary evidence from the COVID-19 pandemic in Zimbabwe
Source: PubMed Central journal article supplement (PMC7556529; doi:10.1371/journal.pone.0240005), 2020-10-14
Supplement: pone.0240005.s007.pdf [file pone.0240005.s007.pdf]

S3 Table. Knowledge

|                 | All               |                   | Female            |                   | Male              |                   | Urban             |                   | Rural            |                   |
|-----------------|-------------------|-------------------|-------------------|-------------------|-------------------|-------------------|-------------------|-------------------|------------------|-------------------|
|                 | No controls       | Controls          | No controls       | Controls          | No controls       | Controls          | No controls       | Controls          | No controls      | Controls          |
| <b>Panel A:</b> |                   |                   |                   |                   |                   |                   |                   |                   |                  |                   |
| Treatment       | 0.26***<br>(0.06) | 0.27***<br>(0.06) | 0.36***<br>(0.11) | 0.36***<br>(0.11) | 0.19**<br>(0.08)  | 0.21**<br>(0.08)  | 0.26***<br>(0.07) | 0.26***<br>(0.07) | 0.36**<br>(0.15) | 0.39***<br>(0.15) |
| <b>Panel B:</b> |                   |                   |                   |                   |                   |                   |                   |                   |                  |                   |
| Treatment       | 0.45***<br>(0.09) | 0.45***<br>(0.09) | 0.49***<br>(0.16) | 0.49***<br>(0.16) | 0.55***<br>(0.14) | 0.54***<br>(0.14) | 0.45***<br>(0.12) | 0.46***<br>(0.12) | 0.62**<br>(0.29) | 0.62**<br>(0.29)  |
| Clusters        | 197               | 197               | 140               | 140               | 164               | 164               | 172               | 172               | 115              | 115               |
| Observations    | 864               | 864               | 393               | 393               | 471               | 471               | 656               | 656               | 208              | 208               |

All specifications include week of intervention fixed effects. Panel A also includes randomization block fixed effects, while Panel B includes WhatsApp broadcast list fixed effects instead. Controls are indicators for Qualtrics response, urban, and female respondents. Standard errors are clustered at week-list level. \*  $p < 0.1$ , \*\*  $p < 0.05$ , \*\*\*  $p < 0.01$ .
