# Supplementary material for: Countering misinformation via WhatsApp: Preliminary evidence from the COVID-19 pandemic in Zimbabwe
Source: PubMed Central journal article supplement (PMC7556529; doi:10.1371/journal.pone.0240005), 2020-10-14
Supplement: pone.0240005.s008.pdf [file pone.0240005.s008.pdf]

S4 Table. Behavior

|                                                            | All                |                    | Female            |                   | Male              |                   | Urban             |                   | Rural            |                  |
|------------------------------------------------------------|--------------------|--------------------|-------------------|-------------------|-------------------|-------------------|-------------------|-------------------|------------------|------------------|
|                                                            | No controls        | Controls           | No controls       | Controls          | No controls       | Controls          | No controls       | Controls          | No controls      | Controls         |
| <b>Panel A:</b>                                            |                    |                    |                   |                   |                   |                   |                   |                   |                  |                  |
| Treatment                                                  | 0.32***<br>(0.08)  | 0.32***<br>(0.07)  | 0.35***<br>(0.10) | 0.35***<br>(0.10) | 0.30**<br>(0.12)  | 0.29**<br>(0.12)  | 0.33***<br>(0.09) | 0.34***<br>(0.09) | 0.26<br>(0.18)   | 0.26<br>(0.18)   |
| Long                                                       | 0.37***<br>(0.08)  | 0.37***<br>(0.08)  | 0.33***<br>(0.11) | 0.34***<br>(0.11) | 0.38***<br>(0.13) | 0.38***<br>(0.13) | 0.34***<br>(0.10) | 0.35***<br>(0.10) | 0.32**<br>(0.15) | 0.34**<br>(0.15) |
| Treatment × Long                                           | -0.30**<br>(0.13)  | -0.31**<br>(0.12)  | -0.33*<br>(0.18)  | -0.34*<br>(0.18)  | -0.28<br>(0.19)   | -0.27<br>(0.18)   | -0.27*<br>(0.15)  | -0.28*<br>(0.15)  | -0.26<br>(0.25)  | -0.27<br>(0.25)  |
| $\alpha(\text{Long} + \text{T} \times \text{Long} \neq 0)$ | 0.43               | 0.45               | 1.00              | 0.99              | 0.38              | 0.35              | 0.50              | 0.54              | 0.72             | 0.70             |
| <b>Panel B:</b>                                            |                    |                    |                   |                   |                   |                   |                   |                   |                  |                  |
| Treatment                                                  | 0.29***<br>(0.09)  | 0.28***<br>(0.09)  | 0.30*<br>(0.17)   | 0.30*<br>(0.17)   | 0.21*<br>(0.12)   | 0.19<br>(0.13)    | 0.30**<br>(0.12)  | 0.30**<br>(0.12)  | 0.22<br>(0.26)   | 0.20<br>(0.27)   |
| Long                                                       | 0.46***<br>(0.09)  | 0.45***<br>(0.09)  | 0.52***<br>(0.12) | 0.52***<br>(0.12) | 0.48***<br>(0.15) | 0.46***<br>(0.15) | 0.47***<br>(0.12) | 0.46***<br>(0.12) | 0.31<br>(0.23)   | 0.29<br>(0.24)   |
| Treatment × Long                                           | -0.40***<br>(0.12) | -0.39***<br>(0.12) | -0.39**<br>(0.19) | -0.39**<br>(0.19) | -0.43**<br>(0.19) | -0.41**<br>(0.20) | -0.35**<br>(0.15) | -0.34**<br>(0.15) | -0.35<br>(0.29)  | -0.31<br>(0.29)  |
| $\alpha(\text{Long} + \text{T} \times \text{Long} \neq 0)$ | 0.47               | 0.42               | 0.34              | 0.34              | 0.69              | 0.68              | 0.19              | 0.19              | 0.86             | 0.91             |
| Clusters                                                   | 197                | 197                | 140               | 140               | 165               | 165               | 172               | 172               | 115              | 115              |
| Observations                                               | 861                | 861                | 390               | 390               | 471               | 471               | 655               | 655               | 206              | 206              |

All specifications include week of intervention fixed effects. Panel A also includes randomization block fixed effects, while Panel B includes WhatsApp broadcast list fixed effects instead. Controls are indicators for Qualtrics response, urban, and female respondents.  $\alpha(\text{Long} + \text{Treatment} \times \text{Long} \neq 0)$  provides the p-value of the joint hypothesis that  $\text{Long} + \text{Treatment} \times \text{Long} \neq 0$ . Standard errors are clustered at week-list level. \*  $p < 0.1$ , \*\*  $p < 0.05$ , \*\*\*  $p < 0.01$ .
